# Supplementary material for: A fast sol–gel synthesis leading to highly crystalline birnessites under non-hydrothermal conditions
Source: Royal Society of Chemistry journal article supplement (doi:10.1039/c7dt00109f), 2017-01-01
Supplement: c7dt00109f1.pdf [file c7dt00109f1.pdf]

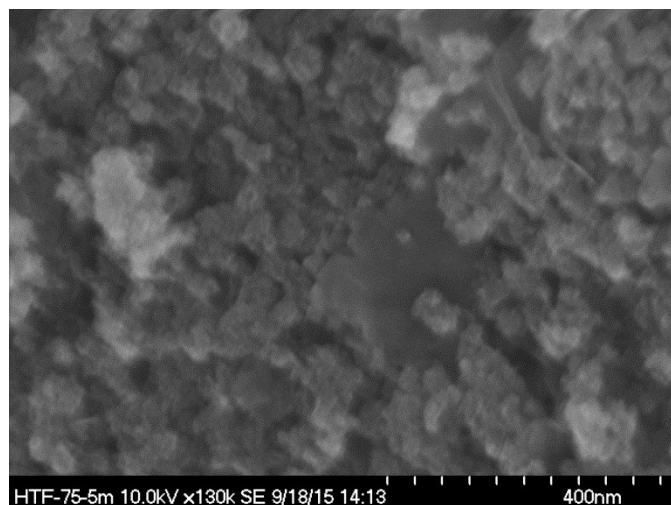

**Supporting Info Figure 1:** SEM images of birnessite synthesized with  $M^+$ /alkali ion molar ratios  $Li^+/Na^+/K^+$  of 0.11/0.68/0.21 isolated after 5 min

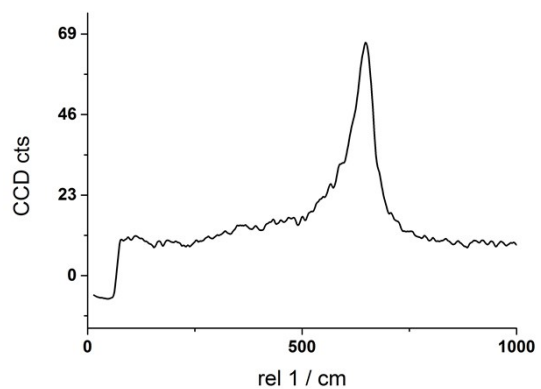

**Supporting Info Figure 2:** Confocal Raman line-scan spectra of birnessite with molar ratio of  $Li^+/Na^+/K^+ = 0.22/0.68/0.11$ .
